# Supplementary material for: Preconditioning of block onset in the Southern Hemisphere: a perspective from static stability
Source: Copernicus journal article supplement (doi:10.5194/egusphere-2022-1038), 2022-10-06

19860609

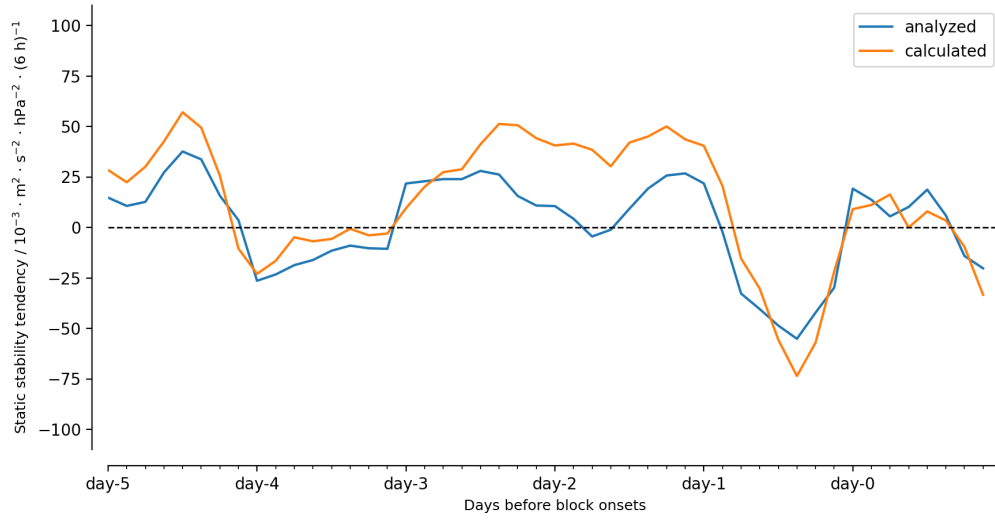

19860624

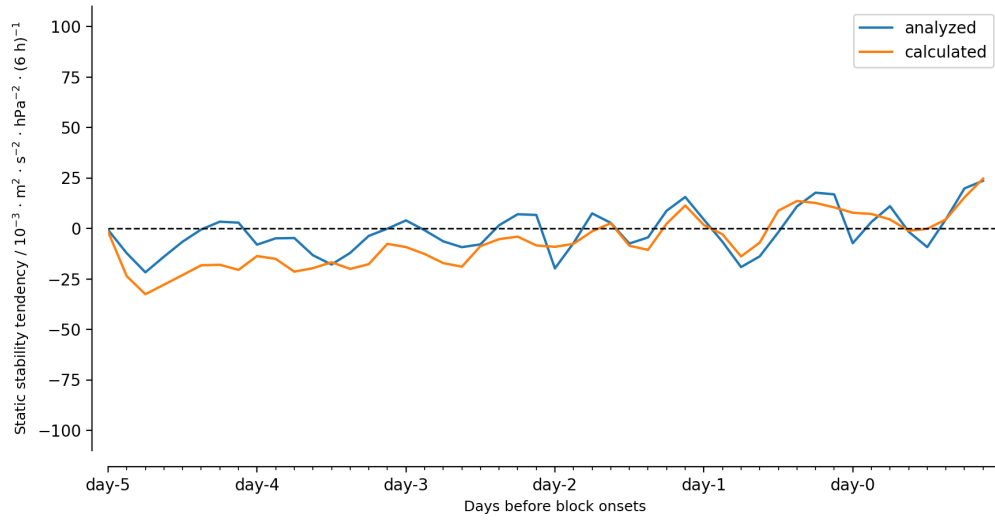

19860727

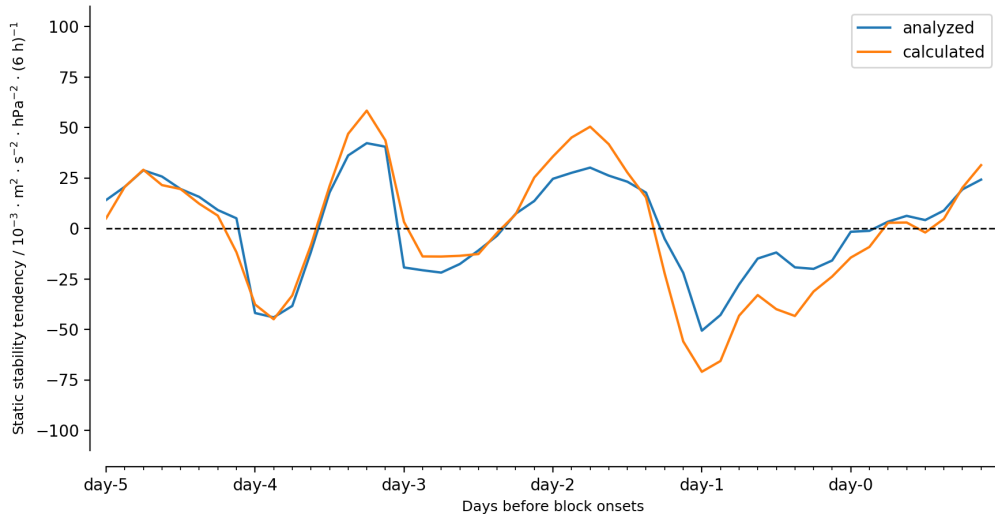

19870620

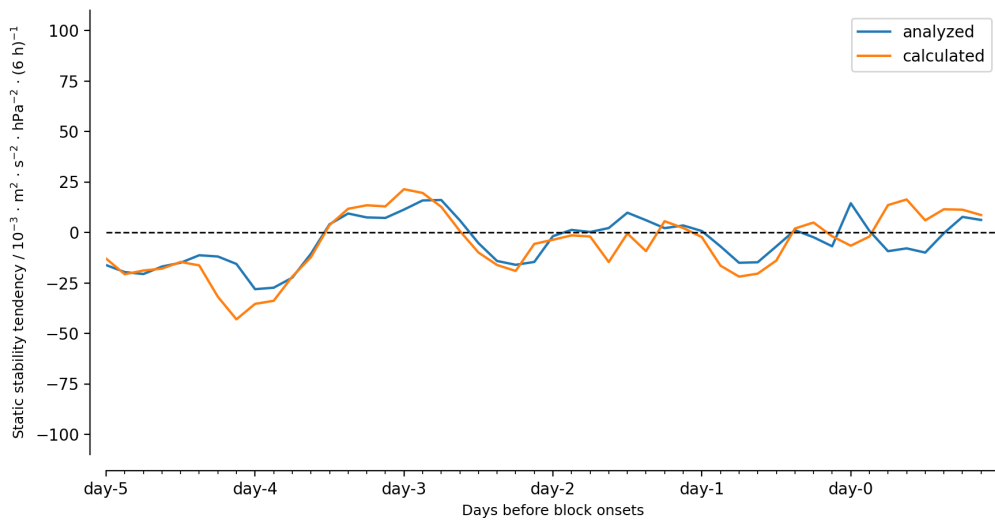

19870705

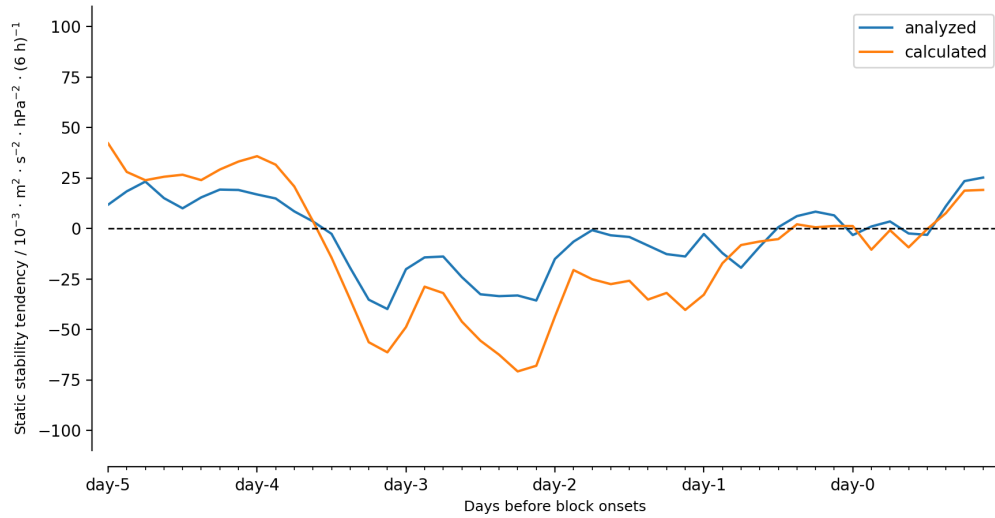

19880815

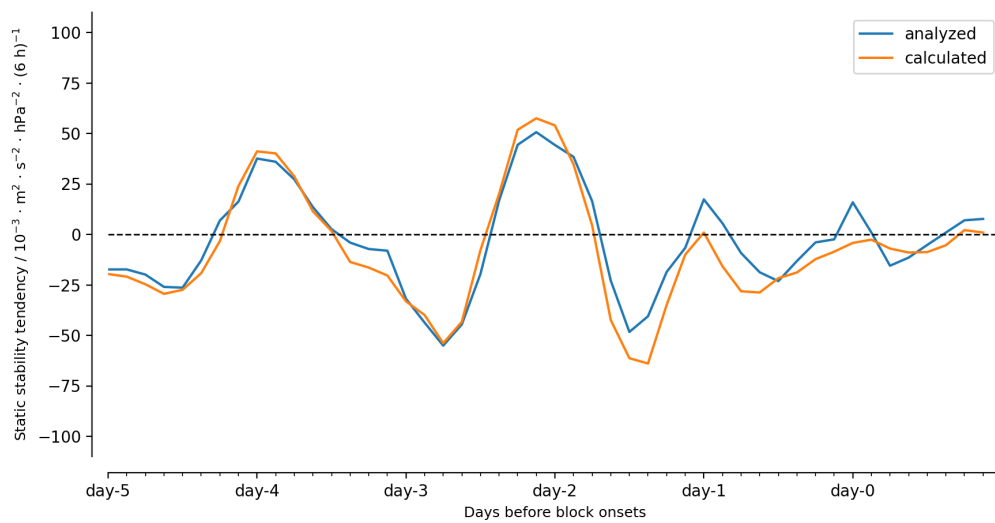

19910520

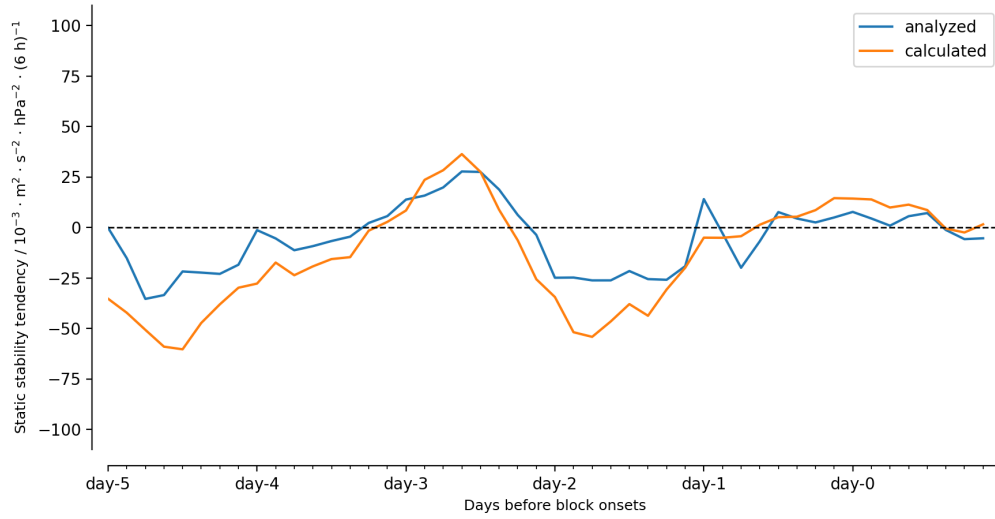

19920615

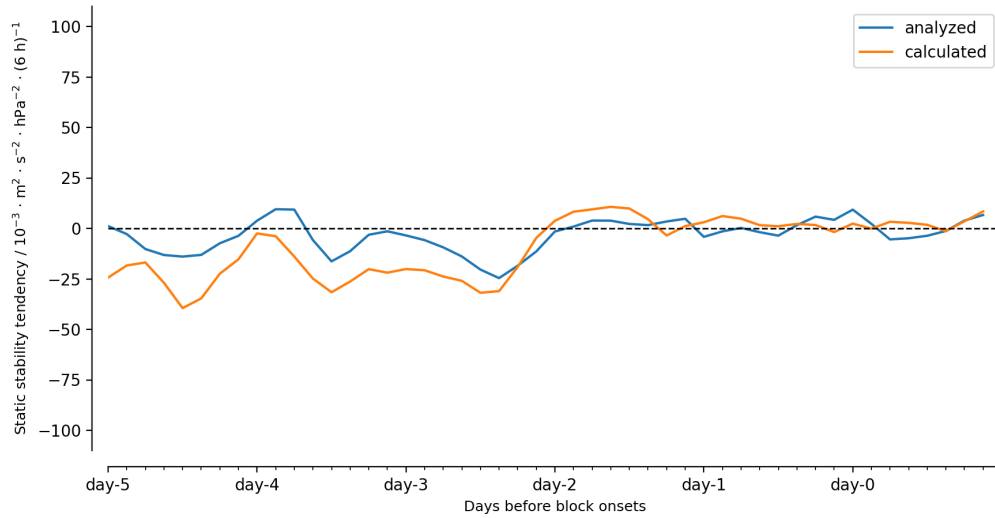

19940529

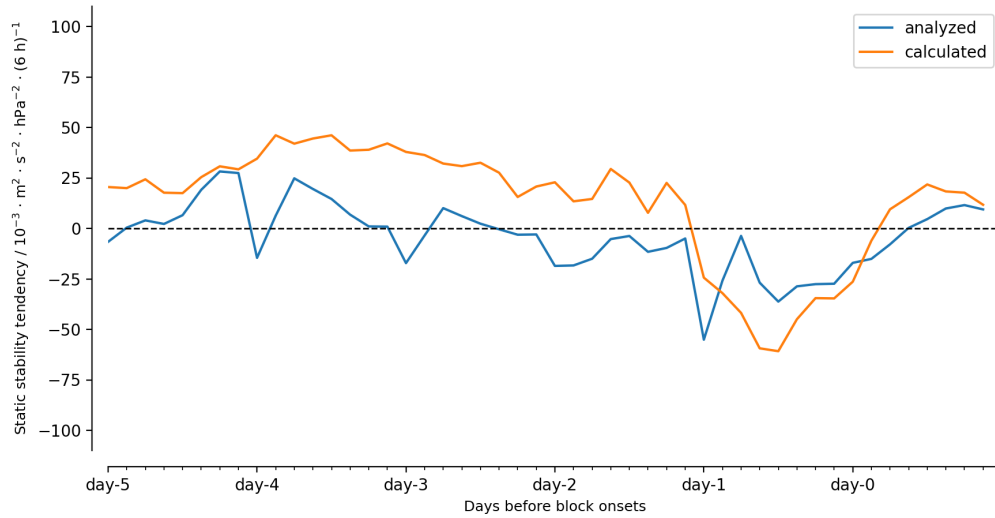

19940917

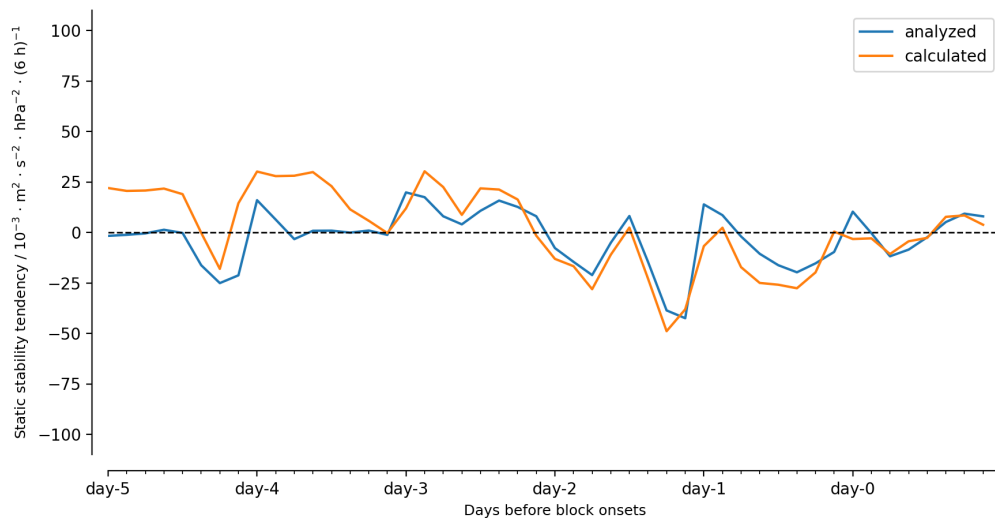

19990725

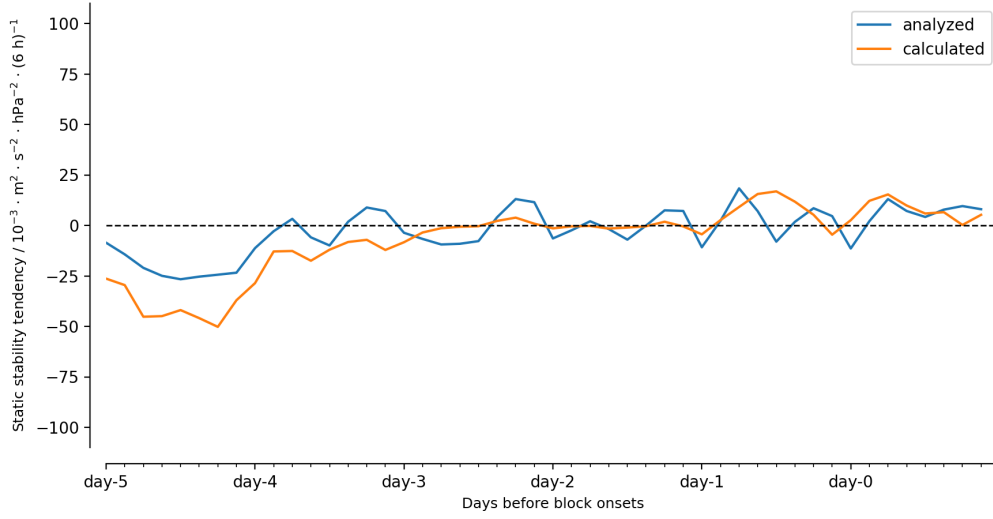

20000711

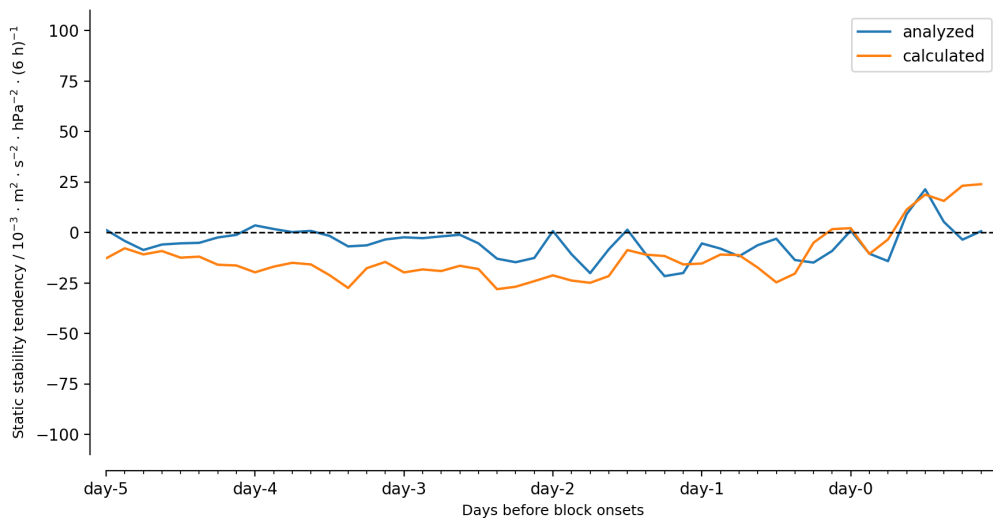

20000823

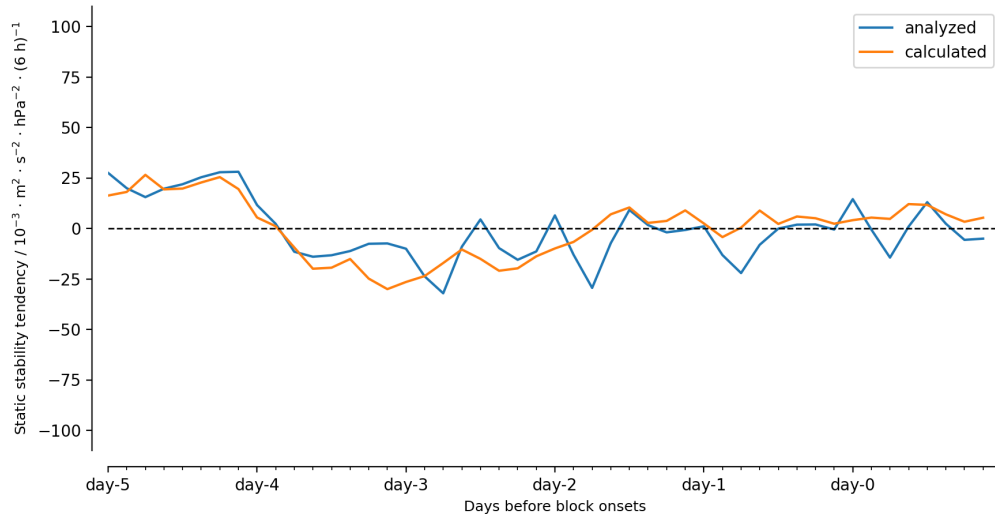

20020609

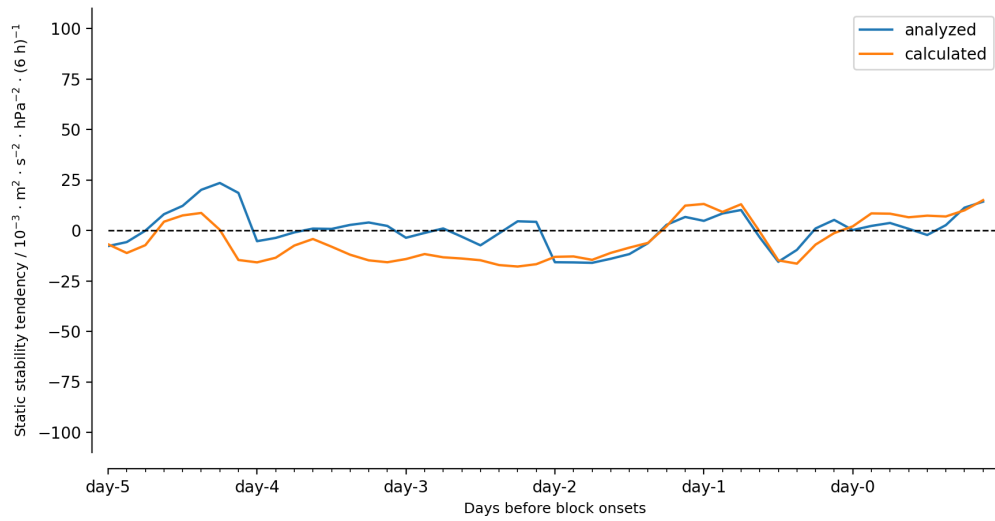

20020811

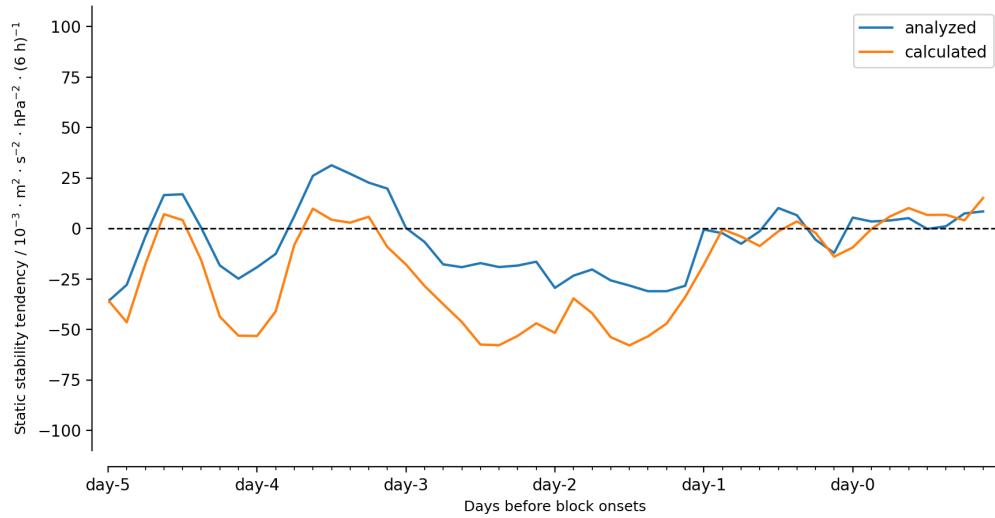

20030317

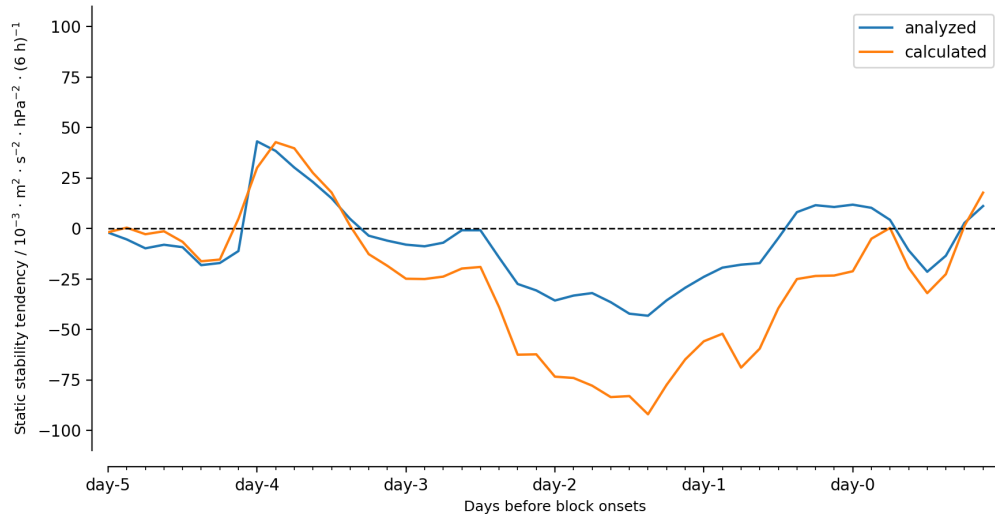



20030827

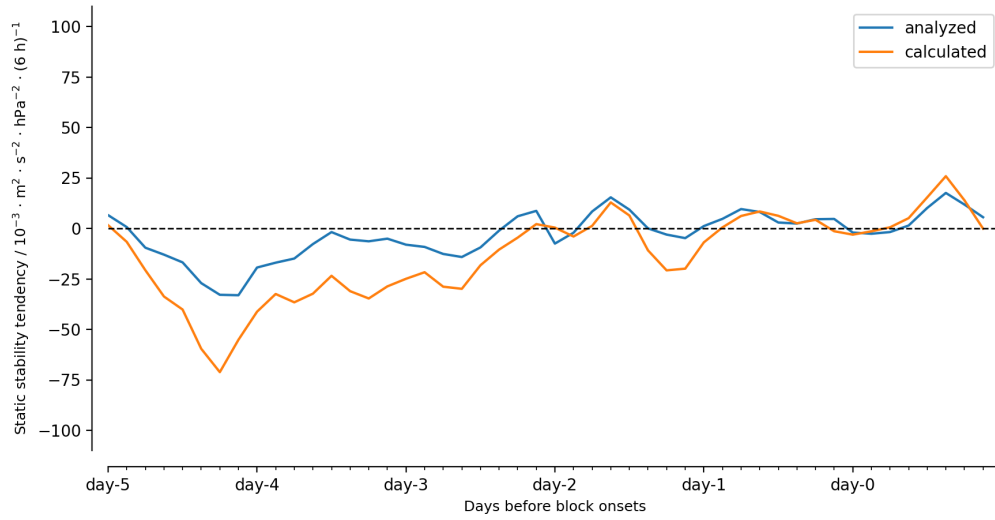

20050601

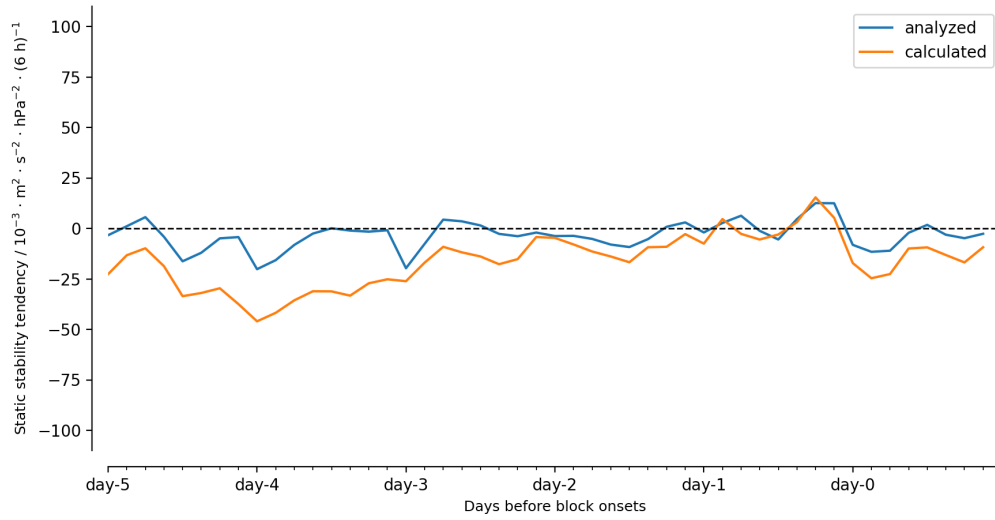

20060619

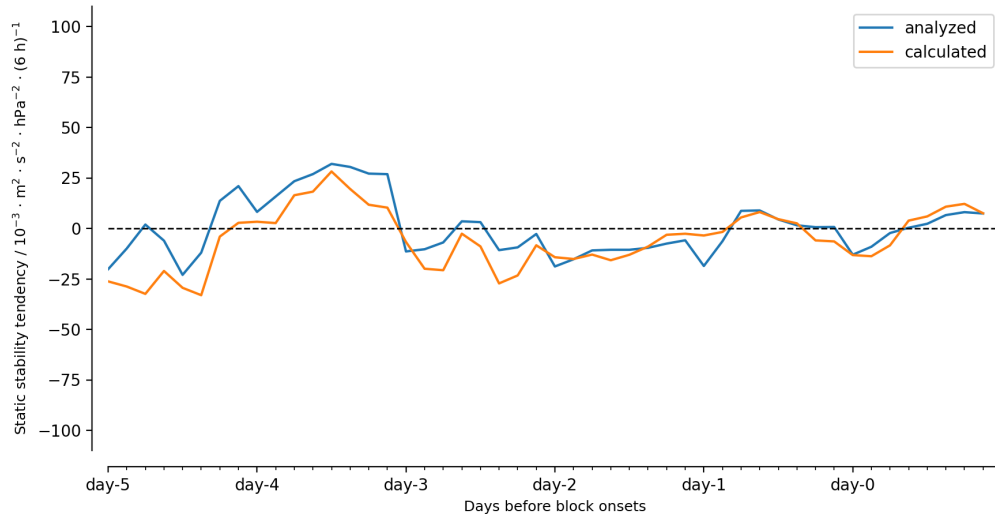

20080723

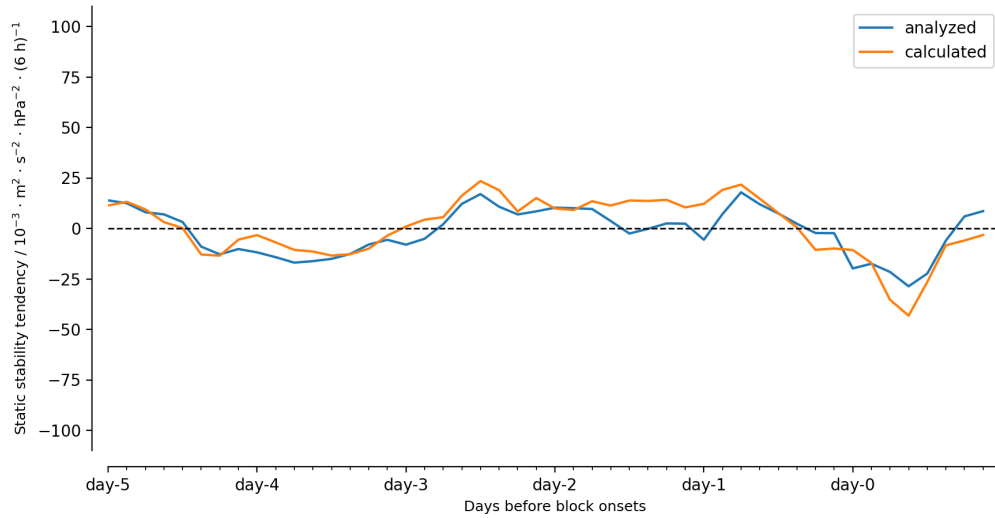

Supplement: Supplementary file [file egusphere-2022-1038-CC2-supplement.pdf]
