# Supplementary material for: Preconditioning of block onset in the Southern Hemisphere: a perspective from static stability
Source: Copernicus journal article supplement (doi:10.5194/egusphere-2022-1038), 2022-10-06

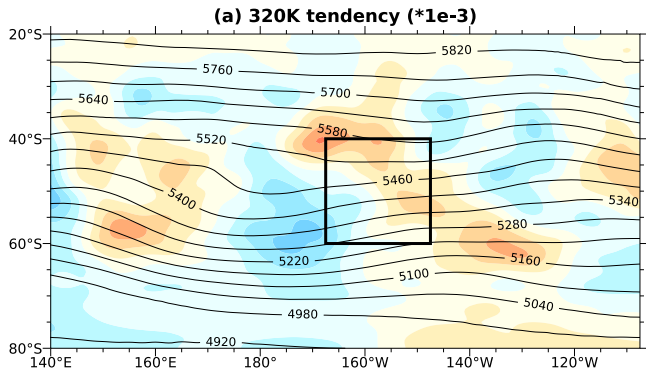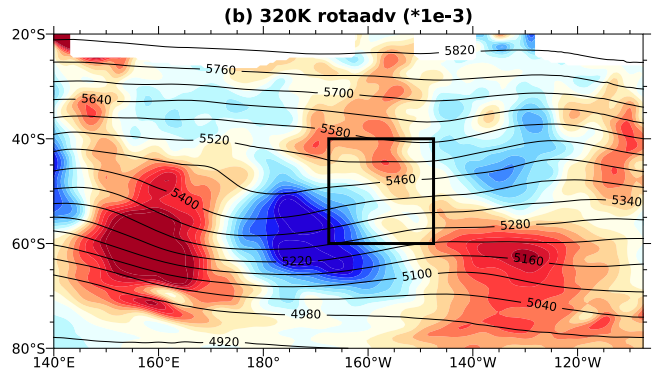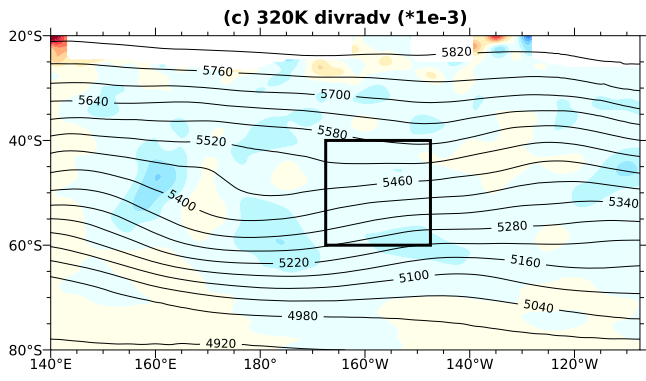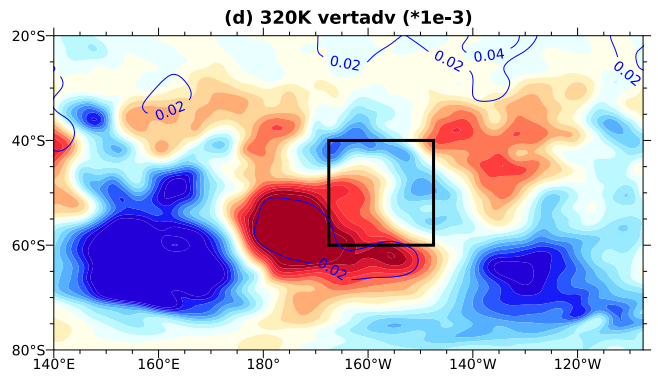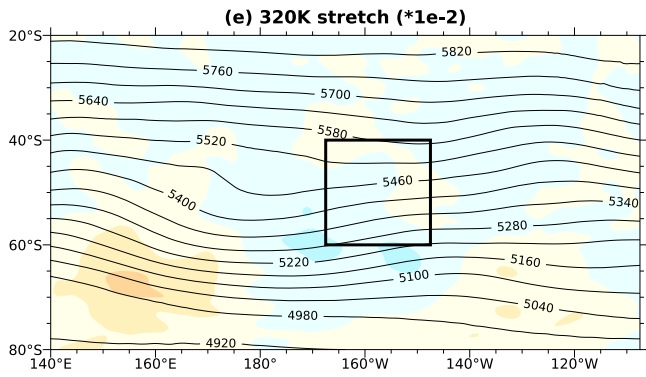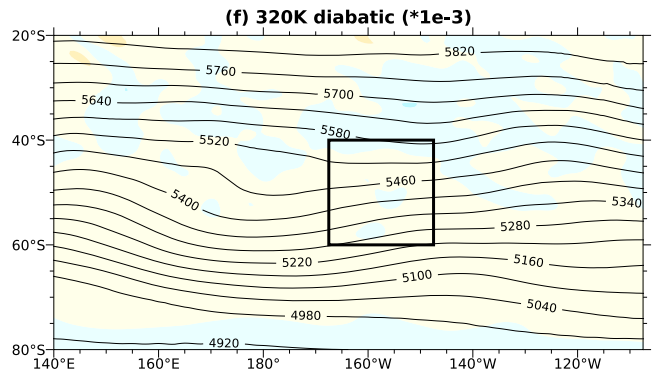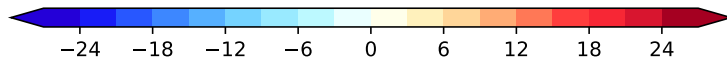

Supplement: Supplementary file [file egusphere-2022-1038-AC2-supplement.pdf]
